# Supplementary material for: Platelet-, monocyte-derived and tissue factor-carrying circulating microparticles are related to acute myocardial infarction severity
Source: PubMed Central journal article supplement (PMC5313202; doi:10.1371/journal.pone.0172558), 2017-02-16
Supplement: pone.0172558.s003.pdf [file pone.0172558.s003.pdf]

| Patient code | CIRCULATING MICROPARTICLES (AV+ cMP/ $\mu$ L plasma) |       |        |            |       |       |
|--------------|------------------------------------------------------|-------|--------|------------|-------|-------|
|              | AV                                                   | CD142 | CD61   | CD142/CD61 | CD62P | CD62L |
| 1            | 180,67                                               | 3,33  | 116    | 1          | 1,67  | 10,33 |
| 2            | 403,67                                               | 4,33  | 379,67 | 0,67       | 7,33  | 8     |
| 3            | 126,5                                                | 5     | 94,5   | 3,5        | 1     | 4,5   |
| 4            | 1236,5                                               | 5     | 1272,5 | 1,5        | 39,5  | 147,5 |
| 5            | 758                                                  | 12,33 | 948,33 | 3          | 17,67 | 7,33  |
| 6            | 198                                                  | 2     | 156    | 0,5        | 2,5   | 28    |
| 7            | 487,5                                                | 2,5   | 363,5  | 1          | 5     | 17,5  |
| 8            | 560                                                  | 1     | 494    | 0          | 7     | 5     |
| 9            | 102                                                  | 1,5   | 97     | 1,5        | 1     | 1     |
| 10           | 297                                                  | 1     | 245    | 0          | 3     | 9,5   |
| 11           | 219,5                                                | 1,5   | 245,5  | 1,5        | 4     | 4,5   |
| 12           | 676                                                  | 8,5   | 654    | 0          | 24    | 40    |
| 13           | 442,5                                                | 1     | 401    | 1          | 5,5   | 16,5  |
| 14           | 477,5                                                | 0,5   | 451,5  | 0,5        | 7,5   | 6,5   |
| 15           | 1783,5                                               | 11,5  | 1689,5 | 0          | 31,5  | 18    |
| 16           | 670,5                                                | 3     | 552,5  | 0,5        | 8     | 18    |
| 17           | 292,5                                                | 1     | 331    | 0,5        | 14    | 11,5  |
| 18           | 449                                                  | 2,5   | 475,5  | 0,5        | 7     | 6,5   |
| 19           | 277                                                  | 0,5   | 261    | 0          | 1,5   | 11,5  |
| 20           | 1118,5                                               | 3     | 1036   | 0,5        | 14,5  | 31,5  |
| 21           | 725                                                  | 4     | 670    | 0,5        | 14,5  | 8     |
| 22           | 346,5                                                | 3     | 384    | 0          | 4,5   | 7     |
| 23           | 214                                                  | 1     | 211    | 0          | 8,5   | 8,5   |
| 24           | 609                                                  | 2     | 589,5  | 0          | 6     | 11    |
| 25           | 224                                                  | 3     | 125    | 2,5        | 4     | 21,5  |
| 26           | 184                                                  | 3,5   | 89,5   | 0,5        | 5,5   | 25,5  |
| 27           | 1093                                                 | 3,5   | 1746   | 0,5        | 22,5  | 16    |
| 28           | 306,5                                                | 1,5   | 234,5  | 0          | 2     | 7     |
| 29           | 937                                                  | 3     | 826    | 0          | 4     | 9     |
| 30           | 900,5                                                | 3,5   | 623    | 1,5        | 18    | 7,5   |
| 31           | 705,5                                                | 1,5   | 667    | 0,5        | 17,5  | 2,5   |
| 32           | 140                                                  | 0,5   | 122,5  | 0,5        | 8     | 8,5   |
| 33           | 169                                                  | 1     | 128    | 0,5        | 1,5   | 22,5  |
| 34           | 547                                                  | 12    | 383,5  | 1,5        | 25    | 21,5  |
| 35           | 127                                                  | 2,5   | 88     | 1          | 2,5   | 13    |
| 36           | 393,5                                                | 3,5   | 325,5  | 1          | 5     | 10    |
| 37           | 320                                                  | 7     | 215,5  | 1,5        | 12    | 6,5   |
| 38           | 217,5                                                | 1     | 257,5  | 1          | 5     | 6,5   |
| 39           | 89                                                   | 5,5   | 59     | 2,5        | 0,5   | 4     |
| 40           | 87                                                   | 1,5   | 61     | 0,5        | 3     | 5,5   |
| 41           | 201                                                  | 1     | 175,5  | 0,5        | 6,5   | 4,5   |
| 42           | 137                                                  | 6     | 142    | 3          | 6,5   | 5     |
| 43           | 214                                                  | 3,5   | 209    | 1          | 3,5   | 10    |
| 44           | 1168                                                 | 4     | 1186,5 | 0          | 24,5  | 13,5  |
| 45           | 466,5                                                | 8,5   | 315    | 2,5        | 8     | 22    |
| 46           | 790                                                  | 12,5  | 539    | 2,5        | 69,5  | 31,5  |
| 47           | 189                                                  | 2,5   | 145    | 0,5        | 2,5   | 7,5   |
| 48           | 377,5                                                | 3,5   | 300,5  | 0,5        | 12,5  | 23,5  |

| Patient code | CIRCULATING MICROPARTICLES (AV+ cMP/ $\mu$ L plasma) |       |        |            |       |       |
|--------------|------------------------------------------------------|-------|--------|------------|-------|-------|
|              | AV                                                   | CD142 | CD61   | CD142/CD61 | CD62P | CD62L |
| 49           | 505                                                  | 5     | 384,5  | 0          | 8,5   | 34    |
| 50           | 293                                                  | 1     | 214,5  | 0,5        | 10,5  | 5,5   |
| 51           | 739,5                                                | 2     | 637,5  | 0,5        | 23    | 9     |
| 52           | 105,5                                                | 1,5   | 47     | 0          | 2     | 4     |
| 53           | 527,5                                                | 3,5   | 474,5  | 0          | 15    | 6,5   |
| 54           | 252,5                                                | 2,5   | 251,5  | 0,5        | 9,5   | 10,5  |
| 55           | 154,5                                                | 2     | 156,5  | 0          | 7,5   | 5,5   |
| 56           | 21,67                                                | 0,42  | 17,08  | 0,42       | 0     | 3,33  |
| 57           | 128,5                                                | 1,5   | 114    | 1          | 6,5   | 7,5   |
| 58           | 190,5                                                | 2     | 199,5  | 0          | 12    | 3,5   |
| 59           | 498                                                  | 12    | 549    | 8,5        | 38,5  | 8,5   |
| 60           | 594                                                  | 1,5   | 530,5  | 0,5        | 18    | 9,5   |
| 61           | 546,5                                                | 4     | 568,5  | 2          | 7     | 14    |
| 62           | 342,5                                                | 1     | 412    | 1          | 7     | 10,5  |
| 63           | 2595,5                                               | 11,5  | 6224,5 | 1          | 122,5 | 43    |
| 64           | 822,5                                                | 6     | 940,5  | 3          | 19,5  | 7     |
| 65           | 363                                                  | 8,5   | 401    | 4          | 9     | 25,5  |
| 66           | 329                                                  | 3     | 287    | 0          | 5     | 12,5  |
| 67           | 505                                                  | 2,5   | 416,5  | 1          | 6,5   | 13,5  |
| 68           | 652,5                                                | 17,5  | 431,5  | 1,5        | 65,5  | 34,5  |
| 69           | 205                                                  | 6     | 173,5  | 2,5        | 0,5   | 9     |
| 70           | 137                                                  | 0,5   | 110    | 0          | 0     | 2     |
| 71           | 613                                                  | 2     | 753    | 0,5        | 28,5  | 20    |
| 72           | 681                                                  | 4     | 676    | 0,5        | 15    | 11    |
| 73           | 611,5                                                | 59,5  | 642,5  | 45         | 15    | 10,5  |
| 74           | 420,5                                                | 4     | 359    | 0          | 7     | 17    |
| 75           | 1193                                                 | 101   | 463,5  | 8          | 73    | 50,5  |
| 76           | 583                                                  | 4,5   | 513    | 0          | 8,5   | 15,5  |
| 77           | 852,5                                                | 13    | 568,5  | 1          | 47    | 31    |
| 78           | 683                                                  | 6     | 800    | 2,5        | 22,5  | 15,5  |
| 79           | 623,5                                                | 4,5   | 423    | 0,5        | 8,5   | 37    |
| 80           | 475                                                  | 12,5  | 290,5  | 0,5        | 10,5  | 18    |
| 81           | 175,5                                                | 30,5  | 107,5  | 17,5       | 3,5   | 15,5  |
| 82           | 321,5                                                | 5,5   | 215    | 0,5        | 8     | 60,5  |
| 83           | 314                                                  | 2     | 356,5  | 0          | 11    | 8,5   |
| 84           | 334,5                                                | 11,5  | 212,5  | 5          | 25,5  | 10    |
| 85           | 214,5                                                | 10,5  | 149,5  | 10         | 5     | 26    |
| 86           | 1697                                                 | 58    | 1967   | 10         | 41,5  | 48,5  |
| 87           | 681                                                  | 4     | 597,5  | 1,5        | 16    | 15    |
| 88           | 426,5                                                | 19,5  | 399    | 0,5        | 8,5   | 118   |
| 89           | 1342,5                                               | 54,5  | 782,5  | 3          | 94,5  | 45    |
| 90           | 1090                                                 | 26    | 934    | 7,5        | 68,5  | 53    |
| 91           | 757                                                  | 9     | 638    | 3          | 27    | 22,5  |
| 92           | 250,5                                                | 4     | 235,5  | 1          | 4     | 13    |
| 93           | 155,5                                                | 7     | 81     | 1,5        | 3,5   | 12,5  |
| 94           | 563,5                                                | 1,5   | 450    | 1          | 10    | 4,5   |
| 95           | 164,5                                                | 7     | 80,5   | 1          | 6     | 28    |
| 96           | 155,5                                                | 3,5   | 89     | 0,5        | 0,5   | 6,5   |

| Patient code | CIRCULATING MICROPARTICLES (AV+ cMP/ $\mu$ L plasma) |       |         |            |       |       |
|--------------|------------------------------------------------------|-------|---------|------------|-------|-------|
|              | AV                                                   | CD142 | CD61    | CD142/CD61 | CD62P | CD62L |
| 97           | 210,5                                                | 2,5   | 117,5   | 1          | 2     | 16    |
| 98           | 888,5                                                | 22    | 512     | 3,5        | 95,5  | 56    |
| 99           | 366,5                                                | 9,5   | 185     | 2,5        | 31    | 26    |
| 100          | 1157,5                                               | 44,5  | 520     | 5          | 119   | 125   |
| 101          | 1488,33                                              | 19,32 | 1330,32 | 2,76       | 55,89 | 46,23 |
| 102          | 543                                                  | 9     | 444,5   | 3          | 23,5  | 17,5  |
| 103          | 212,5                                                | 2     | 105     | 0,5        | 4,5   | 15,5  |
| 104          | 1057,5                                               | 43,5  | 612     | 12         | 18,5  | 78    |
| 105          | 426,5                                                | 9     | 298     | 2,5        | 17    | 21,5  |
| 106          | 1283,5                                               | 27,5  | 260     | 3          | 51    | 60    |
| 107          | 1185                                                 | 34,5  | 819,5   | 4          | 49,5  | 48    |
| 108          | 1316,5                                               | 7     | 779     | 0,5        | 11,5  | 8,5   |
| 109          | 857,5                                                | 10,5  | 705     | 1,5        | 20    | 33,5  |
| 110          | 881,5                                                | 29    | 619,5   | 13,5       | 10    | 31,5  |
| 111          | 966                                                  | 38    | 612,5   | 7          | 38,5  | 61    |
| 112          | 398,5                                                | 6     | 269,5   | 1,5        | 4,5   | 18,5  |
| 113          | 844,5                                                | 22    | 789,5   | 6,5        | 21    | 32,5  |
| 114          | 803                                                  | 27    | 609,5   | 6          | 24,5  | 54    |
| 115          | 763                                                  | 19    | 572,5   | 10         | 24    | 31,5  |
| 116          | 506                                                  | 33    | 269     | 2,5        | 15    | 34,5  |
| 117          | 519,5                                                | 21    | 329,5   | 4          | 9,5   | 21    |
| 118          | 714                                                  | 30    | 447     | 3,5        | 26,5  | 24    |
| 119          | 1125                                                 | 31    | 419     | 3,5        | 42    | 84,5  |
| 120          | 411,5                                                | 20    | 357,5   | 4,5        | 14,5  | 14    |
| 121          | 602                                                  | 10,5  | 407,5   | 4          | 7,5   | 27    |
| 122          | 1060                                                 | 52,5  | 1030,5  | 3,5        | 30,5  | 27,5  |
| 123          | 1318,5                                               | 37,5  | 1521,5  | 5,5        | 39,5  | 34,5  |
| 124          | 443                                                  | 16,5  | 292,5   | 2          | 24,5  | 39    |
| 125          | 170                                                  | 7,5   | 109     | 3          | 5,5   | 6     |
| 126          | 282                                                  | 2     | 211     | 1          | 4     | 7,5   |
| 127          | 367                                                  | 7,5   | 193     | 2          | 7,5   | 18,5  |
| 128          | 674,5                                                | 64    | 642,5   | 18         | 64    | 22    |
| 129          | 599,5                                                | 16,5  | 651     | 4          | 6     | 52,5  |
| 130          | 515                                                  | 26,5  | 515     | 7,5        | 20    | 19    |
| 131          | 1034                                                 | 39,5  | 1074    | 12,5       | 21    | 46,5  |
| 132          | 638,5                                                | 37    | 541,5   | 17         | 23    | 30,5  |
| 133          | 482                                                  | 31    | 445,5   | 11         | 15,5  | 20,5  |
| 134          | 453                                                  | 8     | 404,5   | 3          | 24,5  | 16,5  |
| 135          | 856                                                  | 39    | 697     | 2,5        | 49    | 29    |
| 136          | 1757,5                                               | 78    | 1783    | 12,5       | 41,5  | 50,5  |
| 137          | 3576                                                 | 157,5 | 2846    | 16         | 194   | 144   |
| 138          | 1072,5                                               | 42,5  | 738,5   | 3,5        | 42,5  | 48    |
| 139          | 748                                                  | 21    | 745,5   | 6          | 35    | 26,5  |
| 140          | 610                                                  | 12    | 428,5   | 3,5        | 14    | 28,5  |
| 141          | 805,5                                                | 18,5  | 499,5   | 4          | 14,5  | 63,5  |
| 142          | 423,5                                                | 9     | 382,5   | 1          | 6,5   | 28,5  |
| 143          | 792,5                                                | 11    | 688     | 2,5        | 14,5  | 46,5  |
| 144          | 1967,5                                               | 16,5  | 1924    | 3          | 56,5  | 42,5  |

| Patient code | CIRCULATING MICROPARTICLES (AV+ cMP/ $\mu$ L plasma) |       |        |            |       |       |
|--------------|------------------------------------------------------|-------|--------|------------|-------|-------|
|              | AV                                                   | CD142 | CD61   | CD142/CD61 | CD62P | CD62L |
| 145          | 908                                                  | 13,5  | 796,5  | 2,5        | 17    | 13    |
| 146          | 480                                                  | 17    | 372,5  | 5          | 17    | 16,5  |
| 147          | 638,5                                                | 21,5  | 468    | 1,5        | 20    | 23,5  |
| 148          | 2292,5                                               | 155   | 1804,5 | 8          | 98    | 47,5  |
| 149          | 996,5                                                | 13    | 849    | 4,5        | 25    | 34    |
| 150          | 531                                                  | 9     | 520    | 2          | 41,5  | 20,5  |
| 151          | 734                                                  | 10    | 652,5  | 2,5        | 33,5  | 18,5  |
| 152          | 1094,5                                               | 12,5  | 943    | 7          | 47,5  | 19    |
| 153          | 2444,5                                               | 15,5  | 2383   | 5,5        | 94,5  | 41    |
| 154          | 2648,5                                               | 21    | 2126   | 4,5        | 80,5  | 22    |
| 155          | 961                                                  | 26    | 718    | 2          | 44    | 24    |
| 156          | 1189                                                 | 32    | 708,5  | 4,5        | 66    | 41    |
| 157          | 2326,5                                               | 76    | 1727,5 | 7,5        | 136,5 | 69,5  |
| 158          | 630                                                  | 159   | 305,5  | 5          | 54,5  | 26,5  |
| 159          | 1719                                                 | 34,5  | 1330,5 | 6          | 79    | 36,5  |
| 160          | 567,5                                                | 6,5   | 470    | 4,5        | 34    | 25,5  |
| 161          | 581                                                  | 9,5   | 450    | 6          | 40    | 22,5  |
| 162          | 3948                                                 | 96    | 3656   | 5,5        | 204   | 78,5  |
| 163          | 1933,5                                               | 12,5  | 1780   | 2          | 124   | 26,5  |
| 164          | 1596,5                                               | 29,5  | 880    | 4,5        | 79    | 79,5  |
| 165          | 829                                                  | 9,5   | 531,5  | 1          | 41,5  | 18,5  |
| 166          | 857                                                  | 31,5  | 619    | 7          | 35    | 24    |
| 167          | 945,5                                                | 33    | 832,5  | 7          | 74,5  | 49    |
| 168          | 999,5                                                | 43    | 844    | 19,5       | 76    | 52    |
| 169          | 1028                                                 | 71    | 824,5  | 5          | 52,5  | 41,5  |
| 170          | 1410                                                 | 35    | 623    | 3          | 61,5  | 85,5  |
| 171          | 507,5                                                | 14,5  | 165,5  | 1          | 30    | 35    |
| 172          | 704                                                  | 17,5  | 647    | 6,5        | 27    | 30,5  |
| 173          | 425                                                  | 42    | 326,5  | 20         | 30,5  | 29,5  |
| 174          | 1718                                                 | 26    | 1202   | 9,5        | 150   | 81    |
| 1106         | 727                                                  | 8     | 640    | 4,5        | 45,5  | 13    |
| 1181         | 846                                                  | 8     | 721,5  | 1,5        | 42,5  | 30    |
| 1182         | 2192,5                                               | 101   | 1697,5 | 54         | 168,5 | 97    |
| 1183         | 1235,5                                               | 15    | 997,5  | 4,5        | 69    | 32,5  |
| 1184         | 1040                                                 | 15,5  | 570    | 2,5        | 76    | 32,5  |
| 1185         | 568,5                                                | 21,5  | 510,5  | 14         | 18    | 12    |
| 1186         | 449                                                  | 8,5   | 322,5  | 1,5        | 19    | 21    |
| 1187         | 672                                                  | 20,5  | 445,5  | 5          | 32,5  | 16,5  |
| 1188         | 705                                                  | 30    | 519    | 11         | 51    | 16    |
| 1189         | 667,5                                                | 10    | 393,5  | 2          | 28    | 18,5  |
| 1190         | 1297,5                                               | 18,5  | 502,5  | 5          | 57    | 43,5  |
| 1191         | 1179                                                 | 41    | 1238,5 | 6,5        | 142,5 | 53,5  |
| 1192         | 933,5                                                | 19,5  | 837    | 5,5        | 55    | 53    |
| 1193         | 2149                                                 | 14,5  | 1888,5 | 5          | 87,5  | 37,5  |
| 1194         | 1759,5                                               | 9,5   | 1384,5 | 3          | 64    | 27,5  |
| 1195         | 1897,5                                               | 30    | 1415,5 | 5          | 135   | 43    |
| 1196         | 1922,5                                               | 57,5  | 1033,5 | 13,5       | 135   | 118,5 |
| 1197         | 1067                                                 | 16    | 700    | 2,5        | 74    | 42,5  |

| Patient code | CIRCULATING MICROPARTICLES (AV+ cMP/ $\mu$ L plasma) |       |       |            |       |       |
|--------------|------------------------------------------------------|-------|-------|------------|-------|-------|
|              | AV                                                   | CD142 | CD61  | CD142/CD61 | CD62P | CD62L |
| 1198         | 1186,5                                               | 22,5  | 974   | 3,5        | 74,5  | 48    |
| 1199         | 822                                                  | 32,5  | 502,5 | 17         | 31,5  | 17,5  |
| 1200         | 419,5                                                | 4     | 224,5 | 1          | 10,5  | 6,5   |
| 1201         | 433                                                  | 35    | 345   | 11         | 32    | 28    |
| 1202         | 744,5                                                | 51    | 469   | 3,5        | 69    | 41    |
| 1203         | 1570                                                 | 74    | 1512  | 9,5        | 84    | 61    |
| 1204         | 1469                                                 | 58,5  | 1126  | 4,5        | 54    | 50,5  |
| 1205         | 1148                                                 | 53    | 927   | 2          | 47    | 42    |

| Patient code | CIRCULATING MICROPARTICLES (AV+ cMP/ $\mu$ L plasma) |       |             |        |        |        |
|--------------|------------------------------------------------------|-------|-------------|--------|--------|--------|
|              | CD146                                                | CD62E | CD146/CD62E | CD309  | CD31   | CD42b  |
| 1            | 2,33                                                 | 22,33 | 1           | 6,67   | 27,33  | 47,67  |
| 2            | 0,67                                                 | 14,67 | 0,67        | 6,33   | 188,67 | 216,33 |
| 3            | 0,5                                                  | 9     | 0,5         | 6,5    | 24,5   | 32     |
| 4            | 2,5                                                  | 31,5  | 0           | 12,5   | 620,5  | 303,5  |
| 5            | 3,33                                                 | 18    | 0,33        | 135,67 | 291,67 | 309,67 |
| 6            | 1,5                                                  | 35,5  | 0,5         | 17     | 29     | 86     |
| 7            | 1,5                                                  | 54    | 0           | 17,5   | 168,5  | 294    |
| 8            | 2                                                    | 9,5   | 0,5         | 6,5    | 143    | 280,5  |
| 9            | 0,5                                                  | 2     | 0,5         | 2,5    | 42,5   | 43,5   |
| 10           | 0,5                                                  | 11    | 0,5         | 2      | 88,5   | 84     |
| 11           | 2                                                    | 15,5  | 0           | 2,5    | 104    | 154,5  |
| 12           | 2,5                                                  | 51    | 0,5         | 18     | 289,5  | 438,5  |
| 13           | 1                                                    | 25,5  | 0           | 13     | 241,5  | 197    |
| 14           | 1                                                    | 20,5  | 0           | 9      | 243,5  | 216,5  |
| 15           | 6,5                                                  | 57    | 1,5         | 52     | 1075   | 1376   |
| 16           | 1                                                    | 33    | 0           | 12     | 291    | 259    |
| 17           | 1,5                                                  | 21,5  | 0,5         | 5,5    | 84,5   | 111    |
| 18           | 0,5                                                  | 11,5  | 0           | 8      | 301    | 259,5  |
| 19           | 0,5                                                  | 20    | 0           | 9      | 115,5  | 133,5  |
| 20           | 1,5                                                  | 80    | 0,5         | 42,5   | 559    | 598,5  |
| 21           | 1                                                    | 16    | 1           | 12,5   | 333    | 277,5  |
| 22           | 1                                                    | 10    | 0           | 3,5    | 153    | 250    |
| 23           | 0,5                                                  | 15    | 0           | 4      | 83,5   | 135    |
| 24           | 0,5                                                  | 14    | 0           | 7      | 258    | 329    |
| 25           | 2,5                                                  | 45,5  | 0           | 26     | 43,5   | 83     |
| 26           | 1,5                                                  | 59,5  | 0,5         | 40,5   | 44,5   | 82     |
| 27           | 2                                                    | 20,5  | 0,5         | 16,5   | 639    | 845,5  |
| 28           | 0                                                    | 12    | 0           | 7,5    | 145,5  | 158    |
| 29           | 1,5                                                  | 29,5  | 0           | 13,5   | 510,5  | 460,5  |
| 30           | 1,5                                                  | 16    | 0           | 10     | 414,5  | 191    |
| 31           | 2                                                    | 12    | 0           | 7,5    | 355    | 231,5  |
| 32           | 0,5                                                  | 16    | 0           | 7      | 56     | 91     |
| 33           | 0                                                    | 38    | 0           | 10     | 35,5   | 76,5   |
| 34           | 2                                                    | 68,5  | 1,5         | 47     | 234,5  | 187    |
| 35           | 0,5                                                  | 40    | 0           | 16,5   | 28,5   | 51,5   |
| 36           | 1                                                    | 27    | 0           | 12     | 102    | 148,5  |
| 37           | 1                                                    | 18    | 0           | 8      | 110,5  | 168,5  |
| 38           | 1,5                                                  | 17,5  | 0,5         | 6,5    | 81     | 127    |
| 39           | 0,5                                                  | 12,5  | 0,5         | 5,5    | 19,5   | 20,5   |
| 40           | 1                                                    | 13,5  | 0,5         | 7,5    | 23,5   | 34     |
| 41           | 0                                                    | 12    | 0           | 3,5    | 85,5   | 88     |
| 42           | 0,5                                                  | 12,5  | 0           | 1      | 40     | 61     |
| 43           | 1                                                    | 21,5  | 0           | 16     | 80     | 119,5  |
| 44           | 1,5                                                  | 24    | 0           | 10,5   | 456,5  | 804,5  |
| 45           | 0                                                    | 22,5  | 0           | 16,5   | 136    | 137    |
| 46           | 2,5                                                  | 104   | 2,5         | 86     | 391    | 313,5  |
| 47           | 1                                                    | 8     | 0,5         | 4,5    | 127,5  | 103,5  |
| 48           | 0,5                                                  | 49,5  | 0           | 35,5   | 120    | 131,5  |

| Patient code | CIRCULATING MICROPARTICLES (AV+ cMP/ $\mu$ L plasma) |       |             |       |        |       |
|--------------|------------------------------------------------------|-------|-------------|-------|--------|-------|
|              | CD146                                                | CD62E | CD146/CD62E | CD309 | CD31   | CD42b |
| 49           | 3                                                    | 85,5  | 1,5         | 29    | 149    | 266   |
| 50           | 0,5                                                  | 4,5   | 0           | 4     | 67,5   | 118   |
| 51           | 1                                                    | 14,5  | 0,5         | 9     | 286,5  | 370,5 |
| 52           | 0                                                    | 2,5   | 0           | 3     | 25     | 20,5  |
| 53           | 1                                                    | 12,5  | 0           | 8,5   | 208    | 249   |
| 54           | 2,5                                                  | 27    | 1           | 9,5   | 89     | 158,5 |
| 55           | 1,5                                                  | 5     | 0           | 3,5   | 61     | 81    |
| 56           | 0,42                                                 | 12,08 | 0,83        | 2,92  | 5,42   | 10,83 |
| 57           | 1                                                    | 4,5   | 0           | 2,5   | 30     | 37    |
| 58           | 1                                                    | 10,5  | 0           | 4     | 74     | 76,5  |
| 59           | 1                                                    | 17,5  | 0,5         | 5     | 294    | 397,5 |
| 60           | 0,5                                                  | 9,5   | 0           | 5,5   | 314    | 444   |
| 61           | 1,5                                                  | 14    | 0,5         | 2     | 210,5  | 279,5 |
| 62           | 0,5                                                  | 10    | 0           | 3     | 139,5  | 125   |
| 63           | 4,5                                                  | 46,5  | 0,5         | 69,5  | 1708,5 | 912   |
| 64           | 1                                                    | 47,5  | 1           | 6     | 378    | 380   |
| 65           | 2                                                    | 27    | 0,5         | 6,5   | 146,5  | 195,5 |
| 66           | 1,5                                                  | 14    | 0           | 8,5   | 102,5  | 145,5 |
| 67           | 0,5                                                  | 22,5  | 0           | 8,5   | 168    | 135   |
| 68           | 2,5                                                  | 123,5 | 0,5         | 81    | 219,5  | 187,5 |
| 69           | 0                                                    | 15    | 0           | 6,5   | 86     | 46    |
| 70           | 0,5                                                  | 33    | 0,5         | 8,5   | 33     | 31,5  |
| 71           | 1,5                                                  | 42    | 1           | 13    | 405    | 459,5 |
| 72           | 1                                                    | 31    | 0           | 13    | 357    | 438   |
| 73           | 1                                                    | 65    | 0           | 9,5   | 341    | 305,5 |
| 74           | 3                                                    | 49    | 1           | 16    | 119    | 141,5 |
| 75           | 12                                                   | 151   | 4,5         | 145,5 | 196    | 254   |
| 76           | 3                                                    | 21    | 0           | 8,5   | 272,5  | 197   |
| 77           | 3                                                    | 71,5  | 0           | 61,5  | 312,5  | 172   |
| 78           | 1                                                    | 23    | 0           | 11,5  | 291,5  | 512   |
| 79           | 1,5                                                  | 80    | 0,5         | 34,5  | 243,5  | 303,5 |
| 80           | 1                                                    | 22,5  | 0           | 11    | 142    | 122   |
| 81           | 0                                                    | 45,5  | 0           | 16,5  | 43     | 58    |
| 82           | 2                                                    | 85    | 2           | 36    | 95     | 80,5  |
| 83           | 0,5                                                  | 10,5  | 0           | 4     | 137    | 232,5 |
| 84           | 0                                                    | 37    | 0           | 26,5  | 105    | 67    |
| 85           | 1                                                    | 48,5  | 1,5         | 21,5  | 109,5  | 135,5 |
| 86           | 10,5                                                 | 124,5 | 2,5         | 204   | 862    | 974,5 |
| 87           | 1                                                    | 15    | 0,5         | 11    | 319,5  | 317,5 |
| 88           | 2                                                    | 100,5 | 1,5         | 56,5  | 145    | 141,5 |
| 89           | 12                                                   | 159   | 3           | 182   | 351    | 353   |
| 90           | 4,5                                                  | 194   | 3,5         | 192,5 | 467    | 685,5 |
| 91           | 1                                                    | 57,5  | 1           | 50    | 459    | 532,5 |
| 92           | 0,5                                                  | 19    | 0           | 4     | 113,5  | 172   |
| 93           | 0,5                                                  | 36    | 0,5         | 20    | 73     | 81,5  |
| 94           | 0,5                                                  | 13    | 0           | 7,5   | 258,5  | 200,5 |
| 95           | 0,5                                                  | 29    | 1           | 23,5  | 49     | 54    |
| 96           | 0,5                                                  | 12,5  | 0,5         | 22    | 23,5   | 16    |

| Patient code | CIRCULATING MICROPARTICLES (AV+ cMP/ $\mu$ L plasma) |        |             |       |        |         |
|--------------|------------------------------------------------------|--------|-------------|-------|--------|---------|
|              | CD146                                                | CD62E  | CD146/CD62E | CD309 | CD31   | CD42b   |
| 97           | 0,5                                                  | 19,5   | 0,5         | 17,5  | 65,5   | 40,5    |
| 98           | 4,5                                                  | 233,5  | 2,5         | 175   | 379    | 379,5   |
| 99           | 0,5                                                  | 72,5   | 1,5         | 63,5  | 113    | 96,5    |
| 100          | 6                                                    | 377    | 6           | 363   | 545    | 566,5   |
| 101          | 6,21                                                 | 146,97 | 2,07        | 91,77 | 954,96 | 1148,16 |
| 102          | 0,5                                                  | 48     | 0,5         | 38    | 254    | 344     |
| 103          | 0                                                    | 48     | 1           | 44    | 55     | 74,5    |
| 104          | 3                                                    | 218,5  | 0,5         | 156,5 | 195    | 310     |
| 105          | 2,5                                                  | 69,5   | 1           | 47,5  | 112,5  | 154     |
| 106          | 7,5                                                  | 336,5  | 6           | 263   | 279,5  | 430     |
| 107          | 3,5                                                  | 294    | 3           | 114   | 340,5  | 588     |
| 108          | 3                                                    | 44     | 0,5         | 34,5  | 627,5  | 387     |
| 109          | 2,5                                                  | 94     | 0,5         | 79,5  | 440    | 552,5   |
| 110          | 7                                                    | 96     | 1,5         | 94,5  | 410    | 316     |
| 111          | 7,5                                                  | 132,5  | 3,5         | 163   | 216    | 198     |
| 112          | 2                                                    | 54     | 0,5         | 46,5  | 126    | 137     |
| 113          | 9                                                    | 69,5   | 3           | 55    | 286    | 413     |
| 114          | 4,5                                                  | 99     | 2,5         | 89,5  | 218,5  | 276     |
| 115          | 3                                                    | 55,5   | 0,5         | 81,5  | 168,5  | 162,5   |
| 116          | 3                                                    | 96,5   | 2           | 53    | 171,5  | 147,5   |
| 117          | 4,5                                                  | 47     | 2           | 67    | 140    | 140     |
| 118          | 5                                                    | 121    | 1,5         | 60    | 129,5  | 204,5   |
| 119          | 11                                                   | 194,5  | 6,5         | 129   | 165,5  | 249,5   |
| 120          | 2                                                    | 35,5   | 0,5         | 55,5  | 175,5  | 104     |
| 121          | 6,5                                                  | 89     | 1,5         | 58    | 171    | 134,5   |
| 122          | 4                                                    | 76,5   | 1           | 70,5  | 478,5  | 339     |
| 123          | 4,5                                                  | 76,5   | 1           | 105   | 950    | 545,5   |
| 124          | 3                                                    | 116    | 0,5         | 56,5  | 192,5  | 259     |
| 125          | 1,5                                                  | 16     | 1           | 9     | 67,5   | 66      |
| 126          | 1                                                    | 23,5   | 0           | 13    | 129    | 100,5   |
| 127          | 0,5                                                  | 80,5   | 0,5         | 63,5  | 100    | 123     |
| 128          | 8                                                    | 66     | 3           | 67    | 250,5  | 173,5   |
| 129          | 3                                                    | 164,5  | 3           | 92,5  | 248,5  | 304     |
| 130          | 4,5                                                  | 62,5   | 1,5         | 44,5  | 246,5  | 287,5   |
| 131          | 8                                                    | 82     | 1,5         | 127   | 477,5  | 458,5   |
| 132          | 5                                                    | 54     | 0,5         | 117,5 | 104,5  | 70      |
| 133          | 1,5                                                  | 40     | 0           | 65,5  | 172    | 101     |
| 134          | 3                                                    | 50     | 1,5         | 76    | 121    | 76,5    |
| 135          | 6                                                    | 47     | 0           | 115   | 260,5  | 301     |
| 136          | 10                                                   | 139    | 1,5         | 211   | 890    | 781,5   |
| 137          | 17                                                   | 211,5  | 4,5         | 469,5 | 1006,5 | 779     |
| 138          | 7                                                    | 78     | 1,5         | 100   | 448,5  | 261     |
| 139          | 5                                                    | 63,5   | 1,5         | 114,5 | 286,5  | 180,5   |
| 140          | 2,5                                                  | 70,5   | 1           | 38,5  | 344,5  | 358,5   |
| 141          | 2                                                    | 122    | 1           | 109   | 368,5  | 359,5   |
| 142          | 1                                                    | 108    | 1,5         | 79,5  | 227    | 152,5   |
| 143          | 3,5                                                  | 100,5  | 2,5         | 224   | 399,5  | 212     |
| 144          | 4,5                                                  | 117,5  | 2,5         | 162,5 | 1274   | 782     |



| Patient code | CIRCULATING MICROPARTICLES (AV+ cMP/ $\mu$ L plasma) |       |             |       |        |        |
|--------------|------------------------------------------------------|-------|-------------|-------|--------|--------|
|              | CD146                                                | CD62E | CD146/CD62E | CD309 | CD31   | CD42b  |
| 145          | 2,5                                                  | 63,5  | 0           | 44    | 439    | 526,5  |
| 146          | 5,5                                                  | 63,5  | 0,5         | 53    | 204,5  | 198    |
| 147          | 2,5                                                  | 71    | 0,5         | 98,5  | 201    | 152    |
| 148          | 15,5                                                 | 195   | 2           | 313,5 | 1232   | 741    |
| 149          | 7                                                    | 107,5 | 2,5         | 133,5 | 518    | 248    |
| 150          | 2                                                    | 72,5  | 1           | 48,5  | 325,5  | 333    |
| 151          | 2,5                                                  | 64,5  | 0,5         | 53,5  | 599,5  | 580,5  |
| 152          | 5,5                                                  | 44,5  | 1           | 36,5  | 750,5  | 509,5  |
| 153          | 5                                                    | 116,5 | 0           | 73    | 1807   | 644    |
| 154          | 7,5                                                  | 86    | 1,5         | 97,5  | 1983   | 954    |
| 155          | 8                                                    | 102,5 | 2,5         | 107   | 436,5  | 521,5  |
| 156          | 12,5                                                 | 127,5 | 3,5         | 136   | 550,5  | 505    |
| 157          | 10,5                                                 | 173   | 5           | 232   | 1139   | 749,5  |
| 158          | 7,5                                                  | 105,5 | 2,5         | 104,5 | 171,5  | 135,5  |
| 159          | 8                                                    | 82,5  | 1,5         | 185,5 | 927    | 579,5  |
| 160          | 2                                                    | 83,5  | 1,5         | 47    | 264    | 281,5  |
| 161          | 2                                                    | 83    | 2,5         | 50,5  | 209    | 242    |
| 162          | 10                                                   | 99    | 1,5         | 89,5  | 3119   | 1810   |
| 163          | 4,5                                                  | 81    | 0,5         | 57,5  | 1243   | 1381,5 |
| 164          | 6                                                    | 252   | 4           | 174,5 | 577,5  | 382    |
| 165          | 2,5                                                  | 90    | 2,5         | 64,5  | 366    | 256,5  |
| 166          | 5                                                    | 62    | 0,5         | 87,5  | 383    | 401,5  |
| 167          | 9                                                    | 132   | 2           | 134,5 | 419,5  | 422,5  |
| 168          | 8,5                                                  | 132   | 5           | 163   | 326    | 252,5  |
| 169          | 6                                                    | 87,5  | 1           | 137   | 472,5  | 210,5  |
| 170          | 6                                                    | 338   | 5           | 220,5 | 460,5  | 626    |
| 171          | 2                                                    | 80,5  | 2           | 62    | 140    | 139,5  |
| 172          | 4                                                    | 69,5  | 1,5         | 76    | 190,5  | 181,5  |
| 173          | 2,5                                                  | 90    | 2,5         | 46    | 200    | 239    |
| 174          | 6                                                    | 346   | 3,5         | 318   | 1007,5 | 954,5  |
| 1106         | 2,5                                                  | 20,5  | 0,5         | 14,5  | 142    | 84,5   |
| 1181         | 3,5                                                  | 72    | 1,5         | 108,5 | 434,5  | 359    |
| 1182         | 10                                                   | 283,5 | 6,5         | 246   | 1368,5 | 944    |
| 1183         | 6,5                                                  | 71,5  | 1,5         | 134,5 | 716    | 379,5  |
| 1184         | 4,5                                                  | 159,5 | 2,5         | 158,5 | 421,5  | 360    |
| 1185         | 1                                                    | 47,5  | 1           | 30    | 349    | 212,5  |
| 1186         | 0,5                                                  | 12,5  | 0           | 35,5  | 205,5  | 133    |
| 1187         | 3                                                    | 75,5  | 1           | 57,5  | 331,5  | 174    |
| 1188         | 1                                                    | 80,5  | 0,5         | 64,5  | 365,5  | 192    |
| 1189         | 2                                                    | 81,5  | 1           | 64,5  | 328    | 263    |
| 1190         | 7                                                    | 227,5 | 5,5         | 160   | 394,5  | 347    |
| 1191         | 6,5                                                  | 69,5  | 0,5         | 120,5 | 501,5  | 635    |
| 1192         | 7                                                    | 71    | 1,5         | 107,5 | 500,5  | 607    |
| 1193         | 4,5                                                  | 102,5 | 0,5         | 103,5 | 1528   | 1473,5 |
| 1194         | 5,5                                                  | 108   | 1,5         | 74,5  | 956    | 1010   |
| 1195         | 4,5                                                  | 193   | 2           | 162   | 1046   | 682    |
| 1196         | 8                                                    | 476   | 9,5         | 383,5 | 733,5  | 735    |
| 1197         | 2,5                                                  | 96,5  | 1,5         | 50,5  | 518,5  | 268,5  |

| Patient code | CIRCULATING MICROPARTICLES (AV+ cMP/ $\mu$ L plasma) |       |             |       |       |       |
|--------------|------------------------------------------------------|-------|-------------|-------|-------|-------|
|              | CD146                                                | CD62E | CD146/CD62E | CD309 | CD31  | CD42b |
| 1198         | 5,5                                                  | 112   | 2           | 86,5  | 674,5 | 321   |
| 1199         | 3                                                    | 109,5 | 1,5         | 90,5  | 387,5 | 251   |
| 1200         | 1                                                    | 23    | 1           | 25,5  | 170   | 91,5  |
| 1201         | 4                                                    | 51    | 1,5         | 94,5  | 125   | 82,5  |
| 1202         | 5                                                    | 97,5  | 1,5         | 147   | 235   | 163   |
| 1203         | 10,5                                                 | 129,5 | 3,5         | 219   | 551   | 194,5 |
| 1204         | 9                                                    | 138,5 | 3           | 179   | 389,5 | 290   |
| 1205         | 8                                                    | 115   | 1           | 136   | 365   | 182   |

| Patient code | CIRCULATING MICROPARTICLES (AV+ cMP/ $\mu$ L plasma) |              |         |          |      |           |
|--------------|------------------------------------------------------|--------------|---------|----------|------|-----------|
|              | CD31/CD42b                                           | CD31+/CD42b- | CD235ab | CD3/CD45 | SMC  | CD142/SMC |
| 1            | 20,33                                                | 7            | 15,33   | 4,67     | 2,33 | 0,67      |
| 2            | 129,67                                               | 59           | 10,33   | 2,67     | 3    | 1,33      |
| 3            | 16,5                                                 | 8            | 7,5     | 3        | 1,5  | 1,5       |
| 4            | 201,5                                                | 419          | 9       | 2,5      | 3,5  | 1         |
| 5            | 208                                                  | 83,67        | 8       | 93,33    | 1    | 0,33      |
| 6            | 28                                                   | 1            | 53      | 9        | 10,5 | 1         |
| 7            | 154                                                  | 14,5         | 49,5    | 14,5     | 3,5  | 0         |
| 8            | 112,5                                                | 30,5         | 17      | 2,5      | 3,5  | 0,5       |
| 9            | 25                                                   | 17,5         | 0,5     | 0,5      | 0,5  | 0,5       |
| 10           | 51,5                                                 | 37           | 11,5    | 1        | 3    | 1,5       |
| 11           | 104                                                  | 0            | 4       | 3,5      | 2,5  | 0,5       |
| 12           | 281                                                  | 8,5          | 31      | 11       | 6,5  | 2         |
| 13           | 149,5                                                | 92           | 26      | 10,5     | 5,5  | 2         |
| 14           | 160,5                                                | 83           | 17      | 4,5      | 3,5  | 1,5       |
| 15           | 1116                                                 | 0            | 24      | 7        | 5    | 2,5       |
| 16           | 166,5                                                | 124,5        | 46      | 2,5      | 8    | 2         |
| 17           | 86,5                                                 | 0            | 0,5     | 1        | 4,5  | 4         |
| 18           | 222,5                                                | 78,5         | 4       | 0        | 4    | 2         |
| 19           | 76                                                   | 39,5         | 15      | 4        | 1    | 0         |
| 20           | 407                                                  | 152          | 72      | 19,5     | 14,5 | 3         |
| 21           | 192,5                                                | 140,5        | 36      | 2,5      | 3    | 2,5       |
| 22           | 156,5                                                | 0            | 8,5     | 5        | 6    | 4,5       |
| 23           | 80                                                   | 3,5          | 17,5    | 4        | 2    | 1,5       |
| 24           | 193                                                  | 65           | 11      | 2,5      | 4,5  | 1         |
| 25           | 35                                                   | 8,5          | 38      | 21       | 12   | 4,5       |
| 26           | 41,5                                                 | 3            | 68      | 3,5      | 15   | 3,5       |
| 27           | 660                                                  | 0            | 4,5     | 2        | 7,5  | 3,5       |
| 28           | 119                                                  | 26,5         | 12      | 3        | 5    | 2,5       |
| 29           | 347                                                  | 163,5        | 15,5    | 6,5      | 6,5  | 3,5       |
| 30           | 139,5                                                | 275          | 2,5     | 3        | 2    | 1         |
| 31           | 185,5                                                | 169,5        | 3,5     | 1        | 3    | 2         |
| 32           | 57,5                                                 | 0            | 7,5     | 1,5      | 3    | 0,5       |
| 33           | 30                                                   | 5,5          | 39,5    | 14       | 16,5 | 5,5       |
| 34           | 149,5                                                | 85           | 64      | 21,5     | 0,5  | 0         |
| 35           | 27                                                   | 1,5          | 35,5    | 11,5     | 11   | 4,5       |
| 36           | 80,5                                                 | 21,5         | 24,5    | 7        | 9,5  | 4,5       |
| 37           | 99,5                                                 | 11           | 10,5    | 5        | 6    | 3         |
| 38           | 83                                                   | 0            | 7       | 2        | 3,5  | 2,5       |
| 39           | 13                                                   | 6,5          | 8,5     | 7,5      | 6,5  | 4,5       |
| 40           | 21,5                                                 | 2            | 7,5     | 3,5      | 6    | 4         |
| 41           | 66,5                                                 | 19           | 6,5     | 3,5      | 3    | 1         |
| 42           | 37                                                   | 3            | 9       | 1,5      | 14   | 13,5      |
| 43           | 79,5                                                 | 0,5          | 26      | 10       | 3    | 1,5       |
| 44           | 443,5                                                | 13           | 20,5    | 3,5      | 9,5  | 4,5       |
| 45           | 91,5                                                 | 44,5         | 34      | 11       | 4,5  | 1,5       |
| 46           | 251,5                                                | 139,5        | 103,5   | 36,5     | 0    | 0         |
| 47           | 74                                                   | 53,5         | 15      | 3        | 1,5  | 0         |
| 48           | 81                                                   | 39           | 47,5    | 30,5     | 7,5  | 2,5       |

| Patient code | CIRCULATING MICROPARTICLES (AV+ cMP/ $\mu$ L plasma) |              |         |          |      |           |
|--------------|------------------------------------------------------|--------------|---------|----------|------|-----------|
|              | CD31/CD42b                                           | CD31+/CD42b- | CD235ab | CD3/CD45 | SMC  | CD142/SMC |
| 49           | 161,5                                                | 0            | 55      | 17       | 5,5  | 2         |
| 50           | 69                                                   | 0            | 11,5    | 4        | 4    | 2,5       |
| 51           | 253                                                  | 33,5         | 10      | 5        | 4,5  | 1,5       |
| 52           | 13,5                                                 | 11,5         | 7,5     | 1,5      | 2    | 0,5       |
| 53           | 157                                                  | 51           | 4,5     | 0,5      | 3    | 2         |
| 54           | 95                                                   | 0            | 14      | 4        | 3,5  | 2         |
| 55           | 58,5                                                 | 2,5          | 6,5     | 3,5      | 2,5  | 1         |
| 56           | 4,58                                                 | 0,83         | 7,92    | 3,75     | 3,75 | 3,33      |
| 57           | 23,5                                                 | 6,5          | 4,5     | 1        | 2    | 1,5       |
| 58           | 58                                                   | 16           | 16      | 2        | 2,5  | 0,5       |
| 59           | 310                                                  | 0            | 3       | 6        | 4    | 1,5       |
| 60           | 315                                                  | 0            | 9       | 2,5      | 2,5  | 1,5       |
| 61           | 165,5                                                | 45           | 16      | 5        | 0,5  | 0         |
| 62           | 94,5                                                 | 45           | 90,5    | 3        | 13   | 3         |
| 63           | 838                                                  | 870,5        | 15      | 7        | 0    | 0         |
| 64           | 253,5                                                | 124,5        | 3       | 1,5      | 1    | 0,5       |
| 65           | 139,5                                                | 7            | 20,5    | 11,5     | 7    | 1         |
| 66           | 88                                                   | 14,5         | 15,5    | 6,5      | 9,5  | 2         |
| 67           | 93,5                                                 | 74,5         | 32      | 10,5     | 8,5  | 3         |
| 68           | 128                                                  | 91,5         | 121,5   | 38,5     | 0    | 0         |
| 69           | 36                                                   | 50           | 7       | 13       | 4    | 0,5       |
| 70           | 16                                                   | 17           | 27,5    | 3,5      | 4    | 1,5       |
| 71           | 405,5                                                | 0            | 21      | 12       | 6    | 2         |
| 72           | 331,5                                                | 25,5         | 11,5    | 7        | 7    | 2         |
| 73           | 244,5                                                | 96,5         | 39,5    | 30       | 3,5  | 0,5       |
| 74           | 81,5                                                 | 37,5         | 52      | 18,5     | 5    | 1         |
| 75           | 137,5                                                | 58,5         | 80      | 14       | 0    | 0         |
| 76           | 155,5                                                | 117          | 9       | 2,5      | 1,5  | 0,5       |
| 77           | 121,5                                                | 191          | 54      | 14       | 0    | 0         |
| 78           | 314,5                                                | 0            | 27      | 12,5     | 17,5 | 5         |
| 79           | 211                                                  | 32,5         | 93      | 33,5     | 12   | 3         |
| 80           | 91,5                                                 | 50,5         | 25,5    | 7        | 13,5 | 5         |
| 81           | 37,5                                                 | 5,5          | 21      | 29,5     | 7,5  | 1         |
| 82           | 65,5                                                 | 29,5         | 45      | 4        | 14   | 1,5       |
| 83           | 144,5                                                | 0            | 6       | 2        | 0,5  | 0         |
| 84           | 45                                                   | 60           | 30,5    | 18       | 0    | 0         |
| 85           | 100                                                  | 9,5          | 34      | 36       | 11   | 5         |
| 86           | 750                                                  | 112          | 35,5    | 21       | 0    | 0         |
| 87           | 239                                                  | 80,5         | 9       | 6,5      | 4    | 2,5       |
| 88           | 85,5                                                 | 59,5         | 103     | 53       | 14,5 | 2         |
| 89           | 252                                                  | 99           | 349,5   | 21,5     | 0    | 0         |
| 90           | 480,5                                                | 0            | 151,5   | 73       | 19,5 | 2,5       |
| 91           | 432,5                                                | 26,5         | 43      | 18,5     | 1,5  | 0,5       |
| 92           | 116                                                  | 0            | 13      | 4,5      | 2,5  | 0         |
| 93           | 57                                                   | 16           | 20,5    | 14,5     | 1,5  | 0,5       |
| 94           | 149                                                  | 109,5        | 6,5     | 5        | 5    | 2,5       |
| 95           | 29                                                   | 20           | 43,5    | 15       | 9    | 3         |
| 96           | 7,5                                                  | 16           | 8,5     | 2        | 2,5  | 1,5       |

| Patient code | CIRCULATING MICROPARTICLES (AV+ cMP/ $\mu$ L plasma) |              |         |          |       |           |
|--------------|------------------------------------------------------|--------------|---------|----------|-------|-----------|
|              | CD31/CD42b                                           | CD31+/CD42b- | CD235ab | CD3/CD45 | SMC   | CD142/SMC |
| 97           | 27                                                   | 38,5         | 19      | 3,5      | 4,5   | 3,5       |
| 98           | 258,5                                                | 120,5        | 217     | 69       | 17    | 2         |
| 99           | 68                                                   | 45           | 65,5    | 22       | 6     | 1         |
| 100          | 422                                                  | 123          | 392     | 98       | 28    | 6         |
| 101          | 962,55                                               | 0            | 126,96  | 30,36    | 17,94 | 6,9       |
| 102          | 243,5                                                | 10,5         | 53,5    | 17,5     | 7     | 2         |
| 103          | 45                                                   | 10           | 48      | 15,5     | 1,5   | 1         |
| 104          | 163                                                  | 32           | 327,5   | 70,5     | 22    | 4         |
| 105          | 86,5                                                 | 26           | 70,5    | 13       | 11    | 4         |
| 106          | 215,5                                                | 64           | 772     | 57       | 0     | 0         |
| 107          | 345                                                  | 0            | 350,5   | 85       | 60    | 5,5       |
| 108          | 318                                                  | 309,5        | 33,5    | 34       | 0     | 0         |
| 109          | 386,5                                                | 53,5         | 66,5    | 37       | 16    | 2         |
| 110          | 224,5                                                | 185,5        | 74,5    | 63,5     | 16,5  | 3,5       |
| 111          | 100,5                                                | 115,5        | 257     | 21,5     | 20,5  | 3,5       |
| 112          | 82,5                                                 | 43,5         | 69,5    | 14       | 8     | 3,5       |
| 113          | 269                                                  | 17           | 70      | 12,5     | 3     | 1         |
| 114          | 177,5                                                | 41           | 141     | 30       | 18,5  | 1         |
| 115          | 85                                                   | 83,5         | 33      | 13       | 5     | 0,5       |
| 116          | 99                                                   | 72,5         | 112     | 20       | 16    | 3         |
| 117          | 71,5                                                 | 68,5         | 154     | 17,5     | 6     | 0,5       |
| 118          | 104,5                                                | 25           | 173     | 28,5     | 8,5   | 1         |
| 119          | 112                                                  | 53,5         | 459     | 42       | 25    | 1         |
| 120          | 70,5                                                 | 105          | 31      | 23,5     | 0     | 0         |
| 121          | 78                                                   | 93           | 113     | 23       | 12,5  | 2,5       |
| 122          | 279,5                                                | 199          | 53,5    | 16       | 2     | 0         |
| 123          | 407                                                  | 543          | 51      | 12,5     | 7,5   | 3         |
| 124          | 192,5                                                | 0            | 123     | 41       | 29,5  | 3         |
| 125          | 50                                                   | 17,5         | 13,5    | 8,5      | 16,5  | 0         |
| 126          | 79,5                                                 | 49,5         | 13,5    | 5        | 2     | 1         |
| 127          | 67                                                   | 33           | 89,5    | 19       | 8     | 1         |
| 128          | 147,5                                                | 103          | 60      | 22,5     | 0     | 0         |
| 129          | 190,5                                                | 58           | 147     | 26,5     | 12    | 1,5       |
| 130          | 231                                                  | 15,5         | 25      | 26,5     | 6,5   | 0,5       |
| 131          | 343,5                                                | 134          | 53      | 13       | 10,5  | 2,5       |
| 132          | 44,5                                                 | 60           | 86      | 38       | 9,5   | 3         |
| 133          | 68,5                                                 | 103,5        | 40      | 12,5     | 8,5   | 3,5       |
| 134          | 47                                                   | 74           | 51      | 15       | 13    | 11        |
| 135          | 248                                                  | 12,5         | 48,5    | 20       | 8,5   | 1,5       |
| 136          | 627                                                  | 263          | 54,5    | 30       | 29    | 8,5       |
| 137          | 576                                                  | 430,5        | 785,5   | 40,5     | 12    | 1         |
| 138          | 213,5                                                | 235          | 59,5    | 32       | 13    | 2,5       |
| 139          | 133,5                                                | 153          | 58      | 19,5     | 10,5  | 1         |
| 140          | 303                                                  | 41,5         | 68,5    | 22       | 8     | 2,5       |
| 141          | 265                                                  | 103,5        | 184     | 51,5     | 11    | 2         |
| 142          | 106,5                                                | 120,5        | 113     | 31,5     | 4     | 1         |
| 143          | 169,5                                                | 230          | 71      | 18,5     | 5     | 1         |
| 144          | 675                                                  | 599          | 136     | 15,5     | 10    | 1,5       |

| Patient code | CIRCULATING MICROPARTICLES (AV+ cMP/ $\mu$ L plasma) |              |         |          |      |           |
|--------------|------------------------------------------------------|--------------|---------|----------|------|-----------|
|              | CD31/CD42b                                           | CD31+/CD42b- | CD235ab | CD3/CD45 | SMC  | CD142/SMC |
| 145          | 430,5                                                | 8,5          | 29      | 17       | 6    | 2,5       |
| 146          | 144                                                  | 60,5         | 52,5    | 16,5     | 3,5  | 1         |
| 147          | 97                                                   | 104          | 362,5   | 13,5     | 8,5  | 2,5       |
| 148          | 650                                                  | 582          | 38      | 35,5     | 14,5 | 3,5       |
| 149          | 202                                                  | 316          | 49,5    | 29       | 24,5 | 9,5       |
| 150          | 306,5                                                | 19           | 29,5    | 25       | 15   | 3         |
| 151          | 509                                                  | 90,5         | 37      | 20,5     | 8    | 4         |
| 152          | 456,5                                                | 294          | 27,5    | 10       | 12,5 | 5         |
| 153          | 607,5                                                | 1199,5       | 37,5    | 19,5     | 10   | 1         |
| 154          | 830                                                  | 1153         | 34      | 22,5     | 22   | 4,5       |
| 155          | 386                                                  | 50,5         | 79,5    | 13       | 5    | 0,5       |
| 156          | 368,5                                                | 182          | 77      | 36       | 2    | 0         |
| 157          | 573,5                                                | 565,5        | 148     | 52       | 13,5 | 2,5       |
| 158          | 77,5                                                 | 94           | 152,5   | 27,5     | 6    | 2         |
| 159          | 393,5                                                | 533,5        | 20      | 26,5     | 5    | 2         |
| 160          | 233                                                  | 31           | 56,5    | 34,5     | 4    | 0,5       |
| 161          | 155                                                  | 54           | 61      | 35       | 9    | 2         |
| 162          | 1680                                                 | 1439         | 60      | 16,5     | 6,5  | 3,5       |
| 163          | 1251                                                 | 0            | 44,5    | 14,5     | 22   | 3         |
| 164          | 257                                                  | 320,5        | 313,5   | 62,5     | 18   | 3,5       |
| 165          | 192                                                  | 174          | 110     | 20,5     | 9    | 3         |
| 166          | 355,5                                                | 27,5         | 48,5    | 16       | 15,5 | 5         |
| 167          | 299,5                                                | 120          | 167,5   | 41       | 18   | 2         |
| 168          | 147,5                                                | 178,5        | 204,5   | 33       | 19   | 2         |
| 169          | 163,5                                                | 309          | 57,5    | 14,5     | 9    | 2         |
| 170          | 405                                                  | 55,5         | 585,5   | 88       | 0    | 0         |
| 171          | 101,5                                                | 38,5         | 81      | 37,5     | 10   | 2         |
| 172          | 104,5                                                | 86           | 54      | 33,5     | 9,5  | 3,5       |
| 173          | 192                                                  | 8            | 93      | 48       | 8    | 2         |
| 174          | 727                                                  | 280,5        | 340     | 96       | 31,5 | 3,5       |
| 1106         | 60,5                                                 | 81,5         | 96      | 2        | 28,5 | 3,5       |
| 1181         | 307,5                                                | 127          | 69      | 19       | 7,5  | 1,5       |
| 1182         | 825,5                                                | 543          | 247,5   | 102,5    | 17,5 | 7         |
| 1183         | 338,5                                                | 377,5        | 46,5    | 15       | 1,5  | 0,5       |
| 1184         | 288,5                                                | 133          | 134     | 29       | 13,5 | 3         |
| 1185         | 186,5                                                | 162,5        | 24,5    | 22       | 2    | 0,5       |
| 1186         | 104,5                                                | 101          | 30      | 40       | 6    | 2,5       |
| 1187         | 132                                                  | 199,5        | 52      | 30,5     | 5    | 1         |
| 1188         | 149                                                  | 216,5        | 76      | 26       | 8,5  | 4         |
| 1189         | 210                                                  | 118          | 78      | 24       | 9    | 2,5       |
| 1190         | 243,5                                                | 151          | 530,5   | 28       | 12,5 | 4,5       |
| 1191         | 508,5                                                | 0            | 15,5    | 11       | 2,5  | 1         |
| 1192         | 469,5                                                | 31           | 52      | 21,5     | 5,5  | 2         |
| 1193         | 1288,5                                               | 239,5        | 55      | 20,5     | 4,5  | 0,5       |
| 1194         | 719,5                                                | 236,5        | 92,5    | 22       | 2,5  | 1,5       |
| 1195         | 607,5                                                | 438,5        | 151,5   | 64,5     | 15   | 0,5       |
| 1196         | 516                                                  | 217,5        | 493     | 181,5    | 18   | 2,5       |
| 1197         | 223                                                  | 295,5        | 63,5    | 36,5     | 4,5  | 0,5       |

**CIRCULATING MICROPARTICLES (AV+ cMP/ $\mu$ L plasma)**

| <b>Patient code</b> | <b>CD31/CD42b</b> | <b>CD31+/CD42b-</b> | <b>CD235ab</b> | <b>CD3/CD45</b> | <b>SMC</b> | <b>CD142/SMC</b> |
|---------------------|-------------------|---------------------|----------------|-----------------|------------|------------------|
| 1198                | 275               | 399,5               | 96,5           | 43,5            | 4,5        | 1,5              |
| 1199                | 195,5             | 192                 | 88             | 23,5            | 6          | 0                |
| 1200                | 71                | 99                  | 25,5           | 6,5             | 0,5        | 0,5              |
| 1201                | 48,5              | 76,5                | 68             | 24,5            | 8          | 2                |
| 1202                | 106,5             | 128,5               | 173,5          | 38,5            | 8          | 2                |
| 1203                | 159               | 392                 | 66             | 18,5            | 8          | 2                |
| 1204                | 182               | 207,5               | 144            | 26              | 8          | 2                |
| 1205                | 138               | 227                 | 116            | 28              | 8          | 2                |

| Patient code | CIRCULATING MICROPARTICLES (AV+ cMP/ $\mu$ L plasma) |       |       |            |            |                  |
|--------------|------------------------------------------------------|-------|-------|------------|------------|------------------|
|              | CD45                                                 | CD11b | CD14  | CD11b/CD14 | CD142/CD14 | CD45+/CD3-/CD14- |
| 1            | 67,67                                                | 4,33  | 1,33  | 0          | 0          | 61,67            |
| 2            | 53                                                   | 2     | 3,67  | 0,33       | 1,33       | 46,67            |
| 3            | 52,5                                                 | 2,5   | 2,5   | 1          | 0          | 47               |
| 4            | 53,5                                                 | 3     | 4,5   | 0,5        | 1          | 46,5             |
| 5            | 176,67                                               | 22,33 | 27,33 | 19,33      | 0,33       | 56               |
| 6            | 40                                                   | 7,5   | 2     | 0          | 0          | 29               |
| 7            | 55,5                                                 | 5     | 2     | 0,5        | 0          | 39               |
| 8            | 18                                                   | 1     | 3     | 0          | 0          | 12,5             |
| 9            | 31                                                   | 0,5   | 1,5   | 0          | 0          | 29               |
| 10           | 66,5                                                 | 1     | 1     | 0          | 0          | 64,5             |
| 11           | 49                                                   | 1     | 1     | 0          | 0          | 44,5             |
| 12           | 96,5                                                 | 3     | 3,5   | 1          | 0          | 82               |
| 13           | 87                                                   | 2     | 1,5   | 0          | 0          | 75               |
| 14           | 36,5                                                 | 2,5   | 0,5   | 0          | 0          | 31,5             |
| 15           | 110                                                  | 9     | 3     | 0          | 0          | 100              |
| 16           | 74,5                                                 | 3,5   | 3     | 0          | 0          | 69               |
| 17           | 35,5                                                 | 1     | 2     | 0          | 0          | 32,5             |
| 18           | 67,5                                                 | 0,5   | 1     | 0          | 0          | 66,5             |
| 19           | 42                                                   | 1,5   | 2     | 0          | 0          | 36               |
| 20           | 105,5                                                | 3,5   | 3,5   | 0,5        | 0          | 82,5             |
| 21           | 85,5                                                 | 2     | 1,5   | 0          | 0          | 81,5             |
| 22           | 78                                                   | 4     | 3     | 0,5        | 0,5        | 70               |
| 23           | 20,5                                                 | 0,5   | 1     | 0          | 0          | 15,5             |
| 24           | 74                                                   | 2,5   | 2,5   | 0          | 1          | 69               |
| 25           | 112                                                  | 6     | 2     | 1          | 0,5        | 89               |
| 26           | 48                                                   | 2     | 2,5   | 0          | 0          | 42               |
| 27           | 30                                                   | 5     | 2     | 0,5        | 0          | 26               |
| 28           | 68,5                                                 | 3,5   | 1     | 0          | 0          | 64,5             |
| 29           | 91,5                                                 | 0     | 0     | 0          | 0          | 85               |
| 30           | 112                                                  | 6     | 4     | 0,5        | 0,5        | 105              |
| 31           | 38,5                                                 | 0,5   | 2     | 0,5        | 0          | 35,5             |
| 32           | 40,5                                                 | 1     | 2     | 0,5        | 0          | 37               |
| 33           | 58,5                                                 | 3,5   | 2     | 0          | 0          | 42,5             |
| 34           | 145,5                                                | 12,5  | 4     | 1          | 0          | 120              |
| 35           | 51,5                                                 | 1,5   | 1,5   | 0,5        | 0          | 38,5             |
| 36           | 77                                                   | 3     | 2     | 0          | 0          | 68               |
| 37           | 61,5                                                 | 1     | 2     | 0          | 1,5        | 54,5             |
| 38           | 46,5                                                 | 3     | 1     | 0          | 0          | 43,5             |
| 39           | 45,5                                                 | 3     | 3     | 2          | 1          | 35               |
| 40           | 19                                                   | 2     | 1,5   | 0          | 0          | 14               |
| 41           | 21,5                                                 | 1     | 1     | 0          | 0          | 17               |
| 42           | 13                                                   | 1,5   | 8     | 1          | 4,5        | 3,5              |
| 43           | 71                                                   | 7     | 2     | 0,5        | 0          | 59               |
| 44           | 60,5                                                 | 3     | 6,5   | 0          | 0          | 50,5             |
| 45           | 121                                                  | 9     | 1,5   | 0          | 0,5        | 108,5            |
| 46           | 182,5                                                | 9,5   | 5     | 0          | 1          | 141              |
| 47           | 35                                                   | 2,5   | 2,5   | 0          | 0          | 29,5             |
| 48           | 93                                                   | 5,5   | 3     | 0          | 0,5        | 59,5             |



| Patient code | CIRCULATING MICROPARTICLES (AV+ cMP/ $\mu$ L plasma) |       |      |            |            |                  |
|--------------|------------------------------------------------------|-------|------|------------|------------|------------------|
|              | CD45                                                 | CD11b | CD14 | CD11b/CD14 | CD142/CD14 | CD45+/CD3-/CD14- |
| 49           | 49,5                                                 | 10    | 2    | 0          | 0,5        | 30,5             |
| 50           | 40,5                                                 | 1,5   | 1    | 0          | 0          | 35,5             |
| 51           | 57                                                   | 1,5   | 4    | 0          | 0          | 48               |
| 52           | 30,5                                                 | 2     | 0    | 0          | 0          | 29               |
| 53           | 40                                                   | 2     | 4,5  | 0          | 0          | 35               |
| 54           | 51,5                                                 | 4     | 1,5  | 0          | 0,5        | 46               |
| 55           | 26,5                                                 | 2,5   | 2    | 0,5        | 0          | 21               |
| 56           | 7,5                                                  | 1,67  | 1,25 | 0          | 0          | 2,5              |
| 57           | 36                                                   | 1,5   | 1    | 0          | 0          | 34               |
| 58           | 34,5                                                 | 1     | 1    | 0          | 0          | 31,5             |
| 59           | 40,5                                                 | 7     | 6    | 3,5        | 5          | 28,5             |
| 60           | 58                                                   | 1,5   | 3,5  | 0          | 0          | 52               |
| 61           | 56,5                                                 | 1     | 1,5  | 0          | 1,5        | 50               |
| 62           | 36,5                                                 | 0,5   | 1    | 0          | 0          | 32,5             |
| 63           | 130                                                  | 16    | 6,5  | 0,5        | 0,5        | 116,5            |
| 64           | 59                                                   | 1,5   | 9    | 0,5        | 1          | 48,5             |
| 65           | 169,5                                                | 7     | 5    | 2          | 1          | 153              |
| 66           | 96,5                                                 | 2     | 3    | 0          | 0,5        | 87               |
| 67           | 103                                                  | 4     | 3,5  | 0          | 0,5        | 89               |
| 68           | 119,5                                                | 8,5   | 7,5  | 0          | 1          | 73,5             |
| 69           | 137,5                                                | 0,5   | 1    | 0          | 0          | 123,5            |
| 70           | 50,5                                                 | 1,5   | 1    | 0          | 0          | 46               |
| 71           | 80                                                   | 3,5   | 1,5  | 0          | 0          | 66,5             |
| 72           | 80,5                                                 | 6     | 3,5  | 0          | 1          | 70               |
| 73           | 61                                                   | 25    | 33   | 24,5       | 30,5       | 0                |
| 74           | 75,5                                                 | 4,5   | 4    | 0,5        | 0,5        | 53               |
| 75           | 97,5                                                 | 52,5  | 18,5 | 0,5        | 4          | 65               |
| 76           | 150,5                                                | 2,5   | 3,5  | 0          | 0          | 144,5            |
| 77           | 170,5                                                | 8     | 6    | 1          | 0,5        | 150,5            |
| 78           | 60,5                                                 | 11,5  | 3,5  | 0          | 1          | 44,5             |
| 79           | 152                                                  | 8     | 3,5  | 1          | 0,5        | 115              |
| 80           | 100,5                                                | 4,5   | 6    | 0          | 2          | 87,5             |
| 81           | 46                                                   | 5,5   | 31   | 4          | 24,5       | 0                |
| 82           | 65                                                   | 8     | 4    | 0,5        | 0          | 57               |
| 83           | 40,5                                                 | 3,5   | 1,5  | 0          | 0          | 37               |
| 84           | 118                                                  | 18,5  | 15,5 | 10,5       | 5          | 84,5             |
| 85           | 94,5                                                 | 14    | 11,5 | 5,5        | 7,5        | 47               |
| 86           | 216,5                                                | 25,5  | 19,5 | 0,5        | 1,5        | 176              |
| 87           | 124,5                                                | 5,5   | 5    | 1          | 0          | 113              |
| 88           | 118,5                                                | 9,5   | 11,5 | 1          | 3          | 54               |
| 89           | 140                                                  | 38,5  | 15,5 | 1          | 1          | 103              |
| 90           | 202                                                  | 23    | 10   | 1,5        | 1          | 119              |
| 91           | 151,5                                                | 6,5   | 10   | 0,5        | 0          | 123              |
| 92           | 44                                                   | 4,5   | 1    | 0          | 0          | 38,5             |
| 93           | 49,5                                                 | 5,5   | 7    | 3,5        | 5          | 28               |
| 94           | 99,5                                                 | 3,5   | 1    | 0          | 0          | 93,5             |
| 95           | 28                                                   | 4,5   | 2    | 0          | 0,5        | 11               |
| 96           | 51,5                                                 | 1,5   | 2    | 0,5        | 0,5        | 47,5             |

| Patient code | CIRCULATING MICROPARTICLES (AV+ cMP/ $\mu$ L plasma) |       |      |            |            |                  |
|--------------|------------------------------------------------------|-------|------|------------|------------|------------------|
|              | CD45                                                 | CD11b | CD14 | CD11b/CD14 | CD142/CD14 | CD45+/CD3-/CD14- |
| 97           | 77                                                   | 3     | 4    | 0,5        | 0          | 69,5             |
| 98           | 228                                                  | 18    | 9    | 1,5        | 0          | 150              |
| 99           | 167                                                  | 19,5  | 3    | 0,5        | 1          | 142              |
| 100          | 438                                                  | 45,5  | 15   | 4          | 1          | 325              |
| 101          | 135,93                                               | 13,11 | 8,28 | 2,07       | 0          | 97,29            |
| 102          | 107,5                                                | 5,5   | 3,5  | 1,5        | 0,5        | 86,5             |
| 103          | 94                                                   | 6     | 2,5  | 0          | 0          | 76               |
| 104          | 187                                                  | 21    | 9    | 1,5        | 2          | 107,5            |
| 105          | 160                                                  | 6,5   | 4,5  | 0,5        | 1          | 142,5            |
| 106          | 298,5                                                | 25    | 17   | 2          | 1          | 224,5            |
| 107          | 214,5                                                | 28    | 11   | 3          | 2          | 118,5            |
| 108          | 356,5                                                | 28,5  | 4    | 1,5        | 1          | 318,5            |
| 109          | 243                                                  | 9,5   | 4    | 0,5        | 0,5        | 202              |
| 110          | 267,5                                                | 19,5  | 34   | 8,5        | 9,5        | 170              |
| 111          | 136                                                  | 22,5  | 8,5  | 0,5        | 0,5        | 106              |
| 112          | 141                                                  | 17    | 5,5  | 0,5        | 0,5        | 121,5            |
| 113          | 172                                                  | 23,5  | 6    | 1          | 0          | 153,5            |
| 114          | 229,5                                                | 23    | 13   | 1,5        | 3          | 186,5            |
| 115          | 250                                                  | 24    | 9    | 1,5        | 0,5        | 228              |
| 116          | 163                                                  | 17,5  | 11   | 1,5        | 3          | 132              |
| 117          | 133,5                                                | 14,5  | 7    | 0,5        | 2          | 109              |
| 118          | 153                                                  | 27,5  | 10,5 | 2          | 2          | 114              |
| 119          | 196,5                                                | 24    | 10,5 | 1          | 2,5        | 144              |
| 120          | 209                                                  | 12,5  | 5,5  | 1,5        | 0          | 180              |
| 121          | 210                                                  | 19,5  | 6    | 0,5        | 0          | 181              |
| 122          | 180                                                  | 11,5  | 17   | 0,5        | 1,5        | 147              |
| 123          | 128,5                                                | 17,5  | 8    | 0          | 0,5        | 108              |
| 124          | 146                                                  | 8     | 4    | 0          | 1          | 101              |
| 125          | 91                                                   | 3     | 5    | 2,5        | 2,5        | 77,5             |
| 126          | 128                                                  | 5     | 1    | 0,5        | 0          | 122              |
| 127          | 146                                                  | 8,5   | 1,5  | 0,5        | 0,5        | 125,5            |
| 128          | 141,5                                                | 14,5  | 19,5 | 1          | 5,5        | 99,5             |
| 129          | 182,5                                                | 13    | 6    | 1          | 0,5        | 150              |
| 130          | 184                                                  | 25,5  | 2,5  | 4          | 1,5        | 155              |
| 131          | 202                                                  | 42,5  | 10,5 | 1          | 1          | 178,5            |
| 132          | 162                                                  | 25,5  | 33   | 10         | 14,5       | 91               |
| 133          | 106,5                                                | 20,5  | 7,5  | 2          | 0,5        | 86,5             |
| 134          | 172,5                                                | 24    | 11   | 1          | 0,5        | 146,5            |
| 135          | 159,5                                                | 38,5  | 11,5 | 1,5        | 3          | 128              |
| 136          | 223                                                  | 62    | 16,5 | 1,5        | 3          | 176,5            |
| 137          | 327                                                  | 65,5  | 37,5 | 3,5        | 5,5        | 249              |
| 138          | 308                                                  | 48,5  | 11   | 0,5        | 2,5        | 265              |
| 139          | 149                                                  | 43,5  | 14   | 1,5        | 2          | 115,5            |
| 140          | 214,5                                                | 23,5  | 3,5  | 2,5        | 1          | 189              |
| 141          | 370,5                                                | 24,5  | 9    | 4          | 1          | 310              |
| 142          | 188,5                                                | 8     | 3,5  | 1          | 1          | 153,5            |
| 143          | 210                                                  | 6,5   | 5    | 1          | 0          | 186,5            |
| 144          | 168,5                                                | 13,5  | 10,5 | 0,5        | 1          | 142,5            |

| Patient code | CIRCULATING MICROPARTICLES (AV+ cMP/ $\mu$ L plasma) |       |      |            |            |                  |
|--------------|------------------------------------------------------|-------|------|------------|------------|------------------|
|              | CD45                                                 | CD11b | CD14 | CD11b/CD14 | CD142/CD14 | CD45+/CD3-/CD14- |
| 145          | 205,5                                                | 15    | 4    | 0          | 0,5        | 184,5            |
| 146          | 179,5                                                | 11    | 5    | 1          | 0          | 158              |
| 147          | 167                                                  | 15    | 6,5  | 0,5        | 1,5        | 147              |
| 148          | 313,5                                                | 44    | 23,5 | 1,5        | 3          | 254,5            |
| 149          | 278,5                                                | 23    | 9    | 2,5        | 0,5        | 240,5            |
| 150          | 198,5                                                | 10    | 3,5  | 0          | 0          | 170              |
| 151          | 200,5                                                | 5,5   | 3,5  | 0,5        | 0          | 176,5            |
| 152          | 123,5                                                | 9     | 5,5  | 0,5        | 0          | 108              |
| 153          | 202,5                                                | 15,5  | 6    | 0          | 0          | 177              |
| 154          | 392,5                                                | 21,5  | 14,5 | 1,5        | 2          | 355,5            |
| 155          | 99,5                                                 | 24,5  | 9    | 1,5        | 1          | 77,5             |
| 156          | 267                                                  | 34    | 13   | 1          | 2          | 218              |
| 157          | 398,5                                                | 55,5  | 18   | 1          | 1,5        | 328,5            |
| 158          | 101                                                  | 19    | 85,5 | 1          | 73,5       | 0                |
| 159          | 240,5                                                | 102,5 | 28,5 | 3,5        | 1          | 185,5            |
| 160          | 229,5                                                | 12,5  | 3    | 1          | 0,5        | 192              |
| 161          | 175                                                  | 5,5   | 5,5  | 0,5        | 0,5        | 134,5            |
| 162          | 120                                                  | 18,5  | 47   | 3          | 25         | 56,5             |
| 163          | 96,5                                                 | 9,5   | 5,5  | 0,5        | 0          | 76,5             |
| 164          | 192,5                                                | 20    | 11   | 0          | 4          | 119              |
| 165          | 132,5                                                | 8     | 8    | 0,5        | 0          | 104              |
| 166          | 174,5                                                | 23    | 6,5  | 1,5        | 1          | 152              |
| 167          | 273,5                                                | 29    | 10   | 0,5        | 0,5        | 222,5            |
| 168          | 272                                                  | 55    | 13   | 3          | 2          | 226              |
| 169          | 140                                                  | 23,5  | 12,5 | 0          | 1,5        | 113              |
| 170          | 156,5                                                | 29,5  | 11,5 | 2          | 2          | 57               |
| 171          | 190                                                  | 20    | 8    | 1          | 0,5        | 144,5            |
| 172          | 234,5                                                | 13,5  | 13,5 | 0,5        | 4,5        | 187,5            |
| 173          | 119                                                  | 15,5  | 19   | 9          | 18         | 52               |
| 174          | 346                                                  | 36,5  | 18,5 | 5,5        | 1          | 231,5            |
| 1106         | 5,5                                                  | 90    | 4,5  | 1,5        | 0          | 60               |
| 1181         | 211                                                  | 5,5   | 7    | 0          | 0          | 185              |
| 1182         | 267,5                                                | 67,5  | 92   | 50         | 59         | 73               |
| 1183         | 140,5                                                | 14    | 5    | 0          | 1          | 120,5            |
| 1184         | 232,5                                                | 13    | 13   | 1          | 0          | 190,5            |
| 1185         | 72,5                                                 | 10    | 17,5 | 4,5        | 16,5       | 33               |
| 1186         | 239,5                                                | 21,5  | 2    | 0,5        | 0,5        | 197,5            |
| 1187         | 233                                                  | 15,5  | 6    | 2          | 1          | 196,5            |
| 1188         | 107                                                  | 20    | 26   | 9          | 15         | 55               |
| 1189         | 189,5                                                | 12,5  | 5    | 0          | 0          | 160,5            |
| 1190         | 167                                                  | 8     | 8,5  | 0          | 1          | 130,5            |
| 1191         | 104,5                                                | 31    | 9,5  | 2,5        | 1          | 84               |
| 1192         | 149                                                  | 10    | 4,5  | 0          | 1          | 123              |
| 1193         | 269,5                                                | 15    | 6,5  | 1,5        | 0,5        | 242,5            |
| 1194         | 177,5                                                | 16    | 6,5  | 0          | 1,5        | 149              |
| 1195         | 324                                                  | 26    | 15,5 | 1          | 4          | 244              |
| 1196         | 542                                                  | 36    | 20,5 | 0,5        | 4,5        | 340              |
| 1197         | 298,5                                                | 14    | 8    | 0,5        | 1          | 254              |

| Patient code | CIRCULATING MICROPARTICLES (AV+ cMP/ $\mu$ L plasma) |       |      |            |            |                  |
|--------------|------------------------------------------------------|-------|------|------------|------------|------------------|
|              | CD45                                                 | CD11b | CD14 | CD11b/CD14 | CD142/CD14 | CD45+/CD3-/CD14- |
| 1198         | 214,5                                                | 10,5  | 8,5  | 0          | 1          | 162,5            |
| 1199         | 265                                                  | 15,5  | 28,5 | 4          | 11         | 213              |
| 1200         | 76                                                   | 8,5   | 2    | 0,5        | 0,5        | 67,5             |
| 1201         | 223                                                  | 11,5  | 9    | 0,5        | 0          | 189,5            |
| 1202         | 263,5                                                | 38    | 14,5 | 1          | 1,5        | 210,5            |
| 1203         | 187                                                  | 66,5  | 24   | 3          | 1,5        | 144,5            |
| 1204         | 173                                                  | 14    | 17,5 | 1          | 0,5        | 129,5            |
| 1205         | 237                                                  | 46    | 13   | 0          | 0          | 196              |
